# Supplementary material
Source: publisher figshare collection journal article supplement (https://sage.figshare.com/ndownloader/files/13047557)
Supplement: Supplementary file 1 [file 13047557]

## Appendix A

List of articles included in the meta-analysis  
(For the main and moderating effect analyses; N=51)

- Alexiev, A. S., Jansen, J. J., Van den Bosch, F. A., & Volberda, H. W. (2010). Top management team advice seeking and exploratory innovation: The moderating role of TMT heterogeneity. *Journal of Management Studies*, *47*, 1343-1364.
- Amason, A. C., Liu, J., & Fu, P. (2010). *TMT Demography, Conflict and (Effective) Decision Making: The Key Role of Value Congruence*. Paper presented at the annual meeting of the Academy of Management, Montreal, Canada.
- Atuahene-Gima, K., & Li, H. (2004). Strategic decision comprehensiveness and new product development outcomes in new technology ventures. *Academy of Management Journal*, *47*, 583-597.
- Bantel, K. A. (1994). Strategic planning openness: The role of top team demography. *Group and Organization Management*, *19*, 406-424.
- Barrick, M. R., Bradley, B. H., Kristof-Brown, A. L., & Colbert, A. E. (2007). The moderating role of top management team interdependence: Implications for real teams and working groups. *Academy of Management Journal*, *50*, 544-557.
- Barsade, S. G., Ward, A. J., Turner, J. D., & Sonnenfeld, J. A. (2000). To your heart's content: A model of affective diversity in top management teams. *Administrative Science Quarterly*, *45*, 802-836.
- Basdeo, D. K. (2006). *Executive Information Search within Top Management Teams and its Impact on Organizational Innovation*. Unpublished doctoral dissertation, University of Maryland, College Park, MD.
- Boone, C., & Hendriks, W. (2009). Top management team diversity and firm performance: Moderators of functional-background and locus-of-control diversity. *Management Science*, *55*, 165-180.
- Bunderson, J. S., & Sutcliffe, K. M. (2002). Comparing alternative conceptualizations of functional diversity in management teams: Process and performance effects. *Academy of Management Journal*, *45*, 875-893.
- Buyl, T., Boone, C., Hendriks, W., & Matthysens, P. (2011). Top management team functional diversity and firm performance: The moderating role of CEO characteristics. *Journal of Management Studies*, *48*, 151-177.
- Cai, L., Liu, Q., & Yu, X. (2013). Effects of top management team heterogeneous background and behavioural attributes on the performance of new ventures. *Systems Research and Behavioral Science*, *30*, 354-366.
- Camelo, C., Fernández-Alles, M., & Hernández, A. B. (2010). Strategic consensus, top management teams, and innovation performance. *International Journal of Manpower*, *31*, 678-695.

- Camelo-Ordaz, C., Hernández-Lara, A. B., & Valle-Cabrera, R. (2005). The relationship between top management teams and innovative capacity in companies. *Journal of Management Development, 24*, 683-705.
- Chen, M. J., Lin, H. C., & Michel, J. G. (2010). Navigating in a hypercompetitive environment: The roles of action aggressiveness and TMT integration. *Strategic Management Journal, 31*, 1410-1430.
- Clark, K. D., & Maggitti, P. G. (2012). TMT potency and strategic decision-making in high technology firms. *Journal of Management Studies, 49*, 1168-1193.
- Ensley, M. D., & Hmieleski, K. M. (2005). A comparative study of new venture top management team composition, dynamics and performance between university-based and independent start-ups. *Research Policy, 34*, 1091-1105.
- Foo, M. D., Sin, H. P., & Yiong, L. P. (2006). Effects of team inputs and intrateam processes on perceptions of team viability and member satisfaction in nascent ventures. *Strategic Management Journal, 27*, 389-399.
- Glick, W. H., Miller, C. C., & Huber, G. (1993). The impact of upper-echelon diversity on organizational performance. In G. Huber & W. Glick (Eds.), *Organizational Change and Redesign* (pp. 176-212). New York, NY: Oxford University Press.
- Henneke, D., & Lüthje, C. (2007). Interdisciplinary heterogeneity as a catalyst for product innovativeness of entrepreneurial teams. *Creativity and Innovation Management, 16*, 121-132.
- Jiang, L. (2006). *TMT Diversity, CEO Procedural Fairness, and TMT Conflict*. Unpublished doctoral dissertation, University of Maryland, College Park, MD.
- Kickul, J., & Gundry, L. K. (2001). Breaking through boundaries for organizational innovation: New managerial roles and practices in e-commerce firms. *Journal of Management, 27*, 347-361.
- Knight, D., Pearce, C., Smith, G., Olian, J., Sims, H., Smith, K., & Flood, P. (1999). Top management team diversity, group process, and strategic consensus. *Strategic Management Journal, 20*, 445-465.
- Lankau, M. J., Ward, A., Amason, A., Ng, T., Sonnenfeld, J. A., & Agle, B. R. (2007). Examining the impact of organizational value dissimilarity in top management teams. *Journal of Managerial Issues, 19*, 11-34.
- Lau, C. (2007). *TMT Diversity, Network Ties, Collaborative Decision Making and Organizational Innovation*. Paper presented at the annual meeting of the Academy of Management, Philadelphia, PA.
- Lee, H. (2002). *The Impact of CEO and TMT Characteristics on Strategic Flexibility and Firm Performance*. Unpublished doctoral dissertation, Texas A&M University, College Station, TX.
- Li, C. R. (2013). How top management team diversity fosters organizational ambidexterity: The role of social capital among top executives. *Journal of Organizational Change*

*Management*, 26, 874-896.

- Li, C. R. (2014). Top management team diversity in fostering organizational ambidexterity: Examining TMT integration mechanisms. *Innovation*, 16, 303-322.
- Li, Q., Maggitti, P. G., Smith, K. G., Tesluk, P. E., & Katila, R. (2013). Top management attention to innovation: The role of search selection and intensity in new product introductions. *Academy of Management Journal*, 56, 893-916.
- Li, J., & Hambrick, D. C. (2005). Factional groups: A new vantage on demographic faultlines, conflict, and disintegration in work teams. *Academy of Management Journal*, 48, 794-813.
- Li, C. R., Liu, Y. Y., Lin, C. J., & Ma, H. J. (2016). Top management team diversity, ambidextrous innovation and the mediating effect of top team decision-making processes. *Industry and Innovation*, 23, 260-275.
- Ling, Y. A. N., Simsek, Z., Lubatkin, M. H., & Veiga, J. F. (2008). Transformational leadership's role in promoting corporate entrepreneurship: Examining the CEO-TMT interface. *Academy of Management Journal*, 51, 557-576.
- Liu, W., Gong, Y., & Liu, J. (2014). When do business units benefit more from collective citizenship behavior of management teams? An upper echelons perspective. *Journal of Applied Psychology*, 99, 523-534.
- MacCurtain, S., Flood, P. C., Ramamoorthy, N., West, M. A., & Dawson, J. F. (2010). The top management team, reflexivity, knowledge sharing and new product performance: A study of the Irish software industry. *Creativity and Innovation Management*, 19, 219-232.
- Michie, S. G., Dooley, R. S., & Fryxell, G. E. (2002). *Top Management Team Heterogeneity, Consensus, and Collaboration: A Moderated Mediation Model of Decision Quality*. Paper presented at the annual meeting of the Academy of Management, Denver, Colorado.
- Mooney, A. C. (2000). *The Antecedents to Conflict during Strategic Decision Making: The Importance of Behavioral Integration*. Unpublished doctoral dissertation, University of Georgia, Athens, GA.
- O'Reilly, C., Snyder, R., & Boothe, J. (1993). Effects of executive team demography on organizational change. In G. Huber & W. Glick (Eds.), *Organizational Change and Redesign* (pp. 147-175). New York, NY: Oxford University Press.
- Ou, Y. (2011). *CEO Humility and its Relationship with Middle Manager Behaviors and Performance: Examining the CEO-middle Manager Interface*. Unpublished doctoral dissertation, Arizona State University, Tempe, AZ.
- Palmer, S. L. (2001). *Executive Group Decision-making and Demographic Diversity: Exploring the Roles of Generating Issues and Ideas and Evaluating Outcomes*. Unpublished doctoral dissertation, University of Maryland, College Park, MD.
- Qian, C., Cao, Q., & Takeuchi, R. (2013). Top management team functional diversity and organizational innovation in China: The moderating effects of environment. *Strategic Management Journal*, 34, 110-120.
- Rau, D. (2001). *Knowing Who Knows What: The Effect of Transactive Memory on the*

- Relationship between Diversity of Expertise and Performance in Top Management Teams.* Unpublished doctoral dissertation, University of Minnesota, Minneapolis, MN.
- Reilly, G. P. (2007). *Goals in the Upper Echelon.* Unpublished doctoral dissertation, University of Wisconsin-Madison, Madison, WI.
- Simons, T., Pelled, L. H., & Smith, K. A. (1999). Making use of difference: Diversity, debate, and decision comprehensiveness. *Academy of Management Journal*, 42, 662-673.
- Simsek, Z., Veiga, J., Lubatkin, M., & Dino, R. (2005). Modeling the multilevel determinants of top management team behavioral integration. *Academy of Management Journal*, 48, 69-84.
- Smith, K. G., Smith, K. A., Olian, J. D., Sims Jr, H. P., O'Bannon, D. P., & Scully, J. A. (1994). Top management team demography and process: The role of social integration and communication. *Administrative Science Quarterly*, 39, 412-438.
- Souitaris, V., & Maestro, B. M. (2010). Polychronicity in top management teams: The impact on strategic decision processes and performance of new technology ventures. *Strategic Management Journal*, 31, 652-678.
- Srivastava, A., Bartol, K. M., & Locke, E. A. (2006). Empowering leadership in management teams: Effects on knowledge sharing, efficacy, and performance. *Academy of Management Journal*, 49, 1239-1251.
- Sutcliffe, K. M. (1994). What executives notice: Accurate perceptions in top management teams. *Academy of Management Journal*, 37, 1360-1378.
- Vissa, B., & Chacar, A. S. (2009). Leveraging ties: The contingent value of entrepreneurial teams' external advice networks on Indian software venture performance. *Strategic Management Journal*, 30, 1179-1191.
- Wei, L. Q., & Lau, C. M. (2012). Effective teamwork at the top: The evidence from China. *The International Journal of Human Resource Management*, 23, 1853-1870.
- Wei, L.Q., & Wu, L. (2013). What a diverse top management team means: Testing an integrated model. *Journal of Management Studies*, 50, 389-412.
- Wu, L. Z., Wei, L. Q., & Lau, C. M. (2010). *TMT Educational and Functional Background Diversity, Team Mechanisms and Firm Performance: The Moderating Role of CEO Empowering Leadership.* Paper presented at the annual meeting of the Academy of Management, Montreal, Canada.

## Appendix B

List of articles additionally included for the meta-analytic structural equation modeling analysis (N=152)

- Acar, F. P. (2016). The effects of top management team composition on SME export performance: An upper echelons perspective. *Central European Journal of Operations Research, 24*, 833-852.
- Acuña, S. T., Gómez, M., & Juristo, N. (2009). How do personality, team processes and task characteristics relate to job satisfaction and software quality?. *Information and Software Technology, 51*, 627-639.
- Ali, M., & Konrad, A. M. (2017). Antecedents and consequences of diversity and equality management systems: The importance of gender diversity in the TMT and lower to middle management. *European Management Journal, 35*, 440-453.
- Amason, A. C. (1996). Distinguishing the effects of functional and dysfunctional conflict on strategic decision making: Resolving a paradox for top management teams. *Academy of Management Journal, 39*, 123-148.
- Amason, A. C., & Mooney, A. C. (1999). The effects of past performance on top management team conflict in strategic decision making. *International Journal of Conflict Management, 10*, 340-359.
- Auden, W. C. (2005). *The Implication of International Risk Management Factor for the Relationship between Top Management Team Demographic Composition and Firm Performance*. Unpublished dissertation. Touro University International.
- Ayoko, O. B., Callan, V. J., & Härtel, C. E. (2008). The influence of team emotional intelligence climate on conflict and team members' reactions to conflict. *Small Group Research, 39*, 121-149.
- Barkema, H. G., & Shvyrkov, O. (2007). Does top management team diversity promote or hamper foreign expansion?. *Strategic Management Journal, 28*, 663-680.
- Bayazit, M., & Mannix, E. A. (2003). Should I stay or should I go? Predicting team members' intent to remain in the team. *Small Group Research, 34*, 290-321.
- Beckman, C. M., Burton, M. D., & O'Reilly, C. (2007). Early teams: The impact of team demography on VC financing and going public. *Journal of Business Venturing, 22*, 147-173.
- Beersma, B., Hollenbeck, J. R., Conlon, D. E., Humphrey, S. E., Moon, H., & Ilgen, D. R. (2009). Cutthroat cooperation: The effects of team role decisions on adaptation to alternative reward structures. *Organizational Behavior and Human Decision Processes, 108*, 131-142.
- Bendersky, C., & Hays, N. A. (2012). Status conflict in groups. *Organization Science, 23*, 323-340.
- Bergman, J. Z., Rentsch, J. R., Small, E. E., Davenport, S. W., & Bergman, S. M. (2012). The shared leadership process in decision-making teams. *The Journal of Social Psychology, 152*, 17-42.
- Bierly, P. E., Stark, E. M., & Kessler, E. H. (2009). The moderating effects of virtuality on the

- antecedents and outcome of NPD team trust. *Journal of Product Innovation Management*, 26, 551-565.
- Blair, V. W. (1980). *Socially Shared Cognition and Interaction Processes of Founding Teams: A Study of New Ventures*. Unpublished doctoral dissertation, George Mason University.
- Boeker, W. (1997). Strategic change: The influence of managerial characteristics and organizational growth. *Academy of Management Journal*, 40, 152-170.
- Boerner, S., Linkohr, M., & Kiefer, S. (2011). Top management team diversity: Positive in the short run, but negative in the long run?. *Team Performance Management: An International Journal*, 17, 328-353.
- Bradford, K. D., Stringfellow, A., & Weitz, B. A. (2004). Managing conflict to improve the effectiveness of retail networks. *Journal of Retailing*, 80, 181-195.
- Cannella, A. A., Park, J. H., & Lee, H. U. (2008). Top management team functional background diversity and firm performance: Examining the roles of team member colocation and environmental uncertainty. *Academy of Management Journal*, 51, 768-784.
- Carmeli, A., Sheaffer, Z., & Yitzack Halevi, M. (2009). Does participatory decision-making in top management teams enhance decision effectiveness and firm performance?. *Personnel Review*, 38, 696-714.
- Carmeli, A., & Schaubroeck, J. (2007). The influence of leaders' and other referents' normative expectations on individual involvement in creative work. *The Leadership Quarterly*, 18, 35-48.
- Carpenter, M. A. (2002). The implications of strategy and social context for the relationship between top management team heterogeneity and firm performance. *Strategic Management Journal*, 23, 275-284.
- Carpenter, M. A., & Fredrickson, J. W. (2001). Top management teams, global strategic posture, and the moderating role of uncertainty. *Academy of Management Journal*, 44, 533-545.
- Chen, G., Liu, C., & Tjosvold, D. (2005). Conflict management for effective top management teams and innovation in China. *Journal of Management Studies*, 42, 277-300.
- Chiocchio, F., Forgues, D., Paradis, D., & Iordanova, I. (2011). Teamwork in integrated design projects: Understanding the effects of trust, conflict, and collaboration on performance. *Project Management Journal*, 42, 78-91.
- Choi, J. N., & Sy, T. (2010). Group-level organizational citizenship behavior: Effects of demographic faultlines and conflict in small work groups. *Journal of Organizational Behavior*, 31, 1032-1054.
- Clark, K. D. (2001). *A Relational Approach to Top Management Groups: Social Capital, Information Processing, Co-optation, and Efficiency*. Unpublished doctoral dissertation, University of Maryland.
- Clark, K., & Collins, C. J. (2002). Strategic decision-making in high velocity environments: A theory revisited and a test. In M. A. Hitt, R. Amit, C. E. Lucier, & R. D. Nixon (Eds.), *Creating Value: Winners in the New Business Environment* (pp. 213-239). Oxford, UK: Blackwell Publishing, Ltd.
- Cropanzano, R., Li, A., & Benson III, L. (2011). Peer justice and teamwork process. *Group & Organization Management*, 36, 567-596.

- Crossland, C., Zyung, J., Hiller, N. J., & Hambrick, D. C. (2014). CEO career variety: Effects on firm-level strategic and social novelty. *Academy of Management Journal*, *57*, 652-674.
- Curşeu, P. L. (2010). Team creativity in web site design: An empirical test of a systemic model. *Creativity Research Journal*, *22*, 98-107.
- Curşeu, P. L., Boroş, S., & Oerlemans, L. A. (2012). Task and relationship conflict in short-term and long-term groups: The critical role of emotion regulation. *International Journal of Conflict Management*, *23*, 97-107.
- Curşeu, P. L., & Schruijer, S. G. (2010). Does conflict shatter trust or does trust obliterate conflict? Revisiting the relationships between team diversity, conflict, and trust. *Group Dynamics: Theory, Research, and Practice*, *14*, 66-79.
- Daellenbach, U. S., McCarthy, A. M., & Schoenecker, T. S. (1999). Commitment to innovation: The impact of top management team characteristics. *R&D Management*, *29*, 199-208.
- De Dreu, C. K. (2006). When too little or too much hurts: Evidence for a curvilinear relationship between task conflict and innovation in teams. *Journal of Management*, *32*, 83-107.
- De Dreu, C. K., & West, M. A. (2001). Minority dissent and team innovation: The importance of participation in decision making. *Journal of Applied Psychology*, *86*, 1191-1201.
- DeChurch, L. A., & Marks, M. A. (2001). Maximizing the benefits of task conflict: The role of conflict management. *International Journal of Conflict Management*, *12*, 4-22.
- Desivilya, H. S., & Yagil, D. (2005). The role of emotions in conflict management: The case of work teams. *International Journal of Conflict Management*, *16*, 55-69.
- Devine, D. J. (1999). Effects of cognitive ability, task knowledge, information sharing, and conflict on group decision-making effectiveness. *Small Group Research*, *30*, 608-634.
- Diaz-Fernandez, M. C., Rosario Gonzalez-Rodriguez, M. R., & Pawlak, M. (2014). Top management demographic characteristics and company performance. *Industrial Management & Data Systems*, *114*, 365-386.
- Diaz-Fernandez, M. C., Gonzalez-Rodriguez, M. R., & Simonetti, B. (2015). Top management team's intellectual capital and firm performance. *European Management Journal*, *33*, 322-331.
- Eisenhardt, K. M., & Schoonhoven, C. B. (1990). Organizational growth: Linking founding team, strategy, environment, and growth among US semiconductor ventures, 1978-1988. *Administrative Science Quarterly*, *35*, 504-529.
- Elbanna, S., Thanos, I. C., & Colak, M. (2014). An exploratory study of the determinants of the quality of strategic decision implementation in Turkish industrial firms. *Journal of General Management*, *40*, 27-46.
- Elron, E. (1997). Top management teams within multinational corporations: Effects of cultural heterogeneity. *The Leadership Quarterly*, *8*, 393-412.
- Ensley, M. D., & Pearce, C. L. (2001). Shared cognition in top management teams: Implications for new venture performance. *Journal of Organizational Behavior*, *22*, 145-160.
- Ensley, M. D., Pearson, A. W., & Amason, A. C. (2002). Understanding the dynamics of new venture top management teams: Cohesion, conflict, and new venture performance. *Journal of Business Venturing*, *17*, 365-386.

- Ensley, M. D., Pearson, A. W., & Sardeshmukh, S. R. (2007). The negative consequences of pay dispersion in family and non-family top management teams: An exploratory analysis of new venture, high-growth firms. *Journal of Business Research*, *60*, 1039-1047.
- Farh, J. L., Lee, C., & Farh, C. I. (2010). Task conflict and team creativity: A question of how much and when. *Journal of Applied Psychology*, *95*, 1173-1180.
- Fekula, M. J. (1994). *A Relationship between Top Management Team Expertise and Corporate Strategic Action*. Unpublished doctoral dissertation, The Pennsylvania State University.
- Gamero, N., González-Romá, V., & Peiró, J. M. (2008). The influence of intra-team conflict on work teams' affective climate: A longitudinal study. *Journal of Occupational and Organizational Psychology*, *81*, 47-69.
- Greening, D. W., & Johnson, R. A. (1996). Do managers and strategies matter? A study in crisis. *Journal of Management Studies*, *33*, 25-51.
- Guo, B., Pang, X., & Li, W. (2018). The role of top management team diversity in shaping the performance of business model innovation: A threshold effect. *Technology Analysis & Strategic Management*, *30*, 1-13.
- Haleblian, J., & Finkelstein, S. (1993). Top management team size, CEO dominance, and firm performance: The moderating roles of environmental turbulence and discretion. *Academy of Management Journal*, *36*, 844-863.
- Hambrick, D. C., Cho, T. S., & Chen, M. J. (1996). The influence of top management team heterogeneity on firms' competitive moves. *Administrative Science Quarterly*, *41*, 659-684.
- Hambrick, D. C., Humphrey, S. E., & Gupta, A. (2015). Structural interdependence within top management teams: A key moderator of upper echelons predictions. *Strategic Management Journal*, *36*, 449-461.
- Heavey, C., & Simsek, Z. (2017). Distributed cognition in top management teams and organizational ambidexterity: The influence of transactive memory systems. *Journal of Management*, *43*, 919-945.
- Hinds, P. J., & Mortensen, M. (2005). Understanding conflict in geographically distributed teams: The moderating effects of shared identity, shared context, and spontaneous communication. *Organization Science*, *16*, 290-307.
- Hoegl, M., & Gemuenden, H. G. (2001). Teamwork quality and the success of innovative projects: A theoretical concept and empirical evidence. *Organization Science*, *12*, 435-449.
- Homan, A. C., van Knippenberg, D., Van Kleef, G. A., & De Dreu, C. K. (2007). Interacting dimensions of diversity: Cross-categorization and the functioning of diverse work groups. *Group Dynamics: Theory, Research, and Practice*, *11*, 79-94.
- Houghton, S. M., Stewart, A. C., & Barr, P. S. (2009). Cognitive complexity of the top management team: The impact of team differentiation and integration processes on firm performance. *Current Topics in Management*, *14*, 95-118.
- Hsu, J. L., Chou, H. W., Hwang, W. Y., & Chou, S. B. (2008). A two-dimension process in explaining learners' collaborative behaviors in CSCL. *Journal of Educational Technology & Society*, *11*, 66-80.



- Hjerto, K. B., & Kuvaas, B. (2017). Burning hearts in conflict: New perspectives on the intragroup conflict and team effectiveness relationship. *International Journal of Conflict Management, 28*, 50-73.
- Hurt, K. J. (2013). *Assessing the Impact of Conflict-type on Decision-effectiveness in Top Management Teams: The Moderating Effect of Attributions, Emotions, Conflict-handling Behavior, and the Environment*. Unpublished doctoral dissertation, University Texas-Pan American.
- Iaquinto, A. L., & Fredrickson, J. W. (1997). Top management team agreement about the strategic decision process: A test of some of its determinants and consequences. *Strategic Management Journal, 18*, 63-75.
- Isabella, L. A., & Waddock, S. A. (1994). Top management team certainty: Environmental assessments, teamwork, and performance implications. *Journal of Management, 20*, 835-858.
- Janssen, O., Van de Vliert, E., & Veenstra, C. (1999). How task and person conflict shape the role of positive interdependence in management teams. *Journal of Management, 25*, 117-141.
- Jaw, Y. L., & Lin, W. T. (2009). Corporate elite characteristics and firm's internationalization: CEO-level and TMT-level roles. *The International Journal of Human Resource Management, 20*, 220-233.
- Jehn, K. A. (1994). Enhancing effectiveness: An investigation of advantages and disadvantages of value-based intragroup conflict. *International journal of conflict management, 5*, 223-238.
- Jehn, K. A. (1995). A multimethod examination of the benefits and detriments of intragroup conflict. *Administrative Science Quarterly, 40*, 256-282.
- Jehn, K. A., Chadwick, C., & Thatcher, S. M. (1997). To agree or not to agree: The effects of value congruence, individual demographic dissimilarity, and conflict on workgroup outcomes. *International Journal of Conflict Management, 8*, 287-305.
- Jehn, K. A., & Mannix, E. A. (2001). The dynamic nature of conflict: A longitudinal study of intragroup conflict and group performance. *Academy of Management Journal, 44*, 238-251.
- Jehn, K. A., Northcraft, G. B., & Neale, M. A. (1999). Why differences make a difference: A field study of diversity, conflict and performance in workgroups. *Administrative Science Quarterly, 44*, 741-763.
- Jehn, K. A., Rispens, S., & Thatcher, S. M. (2010). The effects of conflict asymmetry on work group and individual outcomes. *Academy of Management Journal, 53*, 596-616.
- Johnson, R. A., Hoskisson, R. E., & Hitt, M. A. (1993). Board of director involvement in restructuring: The effects of board versus managerial controls and characteristics. *Strategic Management Journal, 14*, 33-50.
- Keck, S. L. (1997). Top management team structure: Differential effects by environmental context. *Organization Science, 8*, 143-156.
- Kilduff, M., Angelmar, R., & Mehra, A. (2000). Top management-team diversity and firm performance: Examining the role of cognitions. *Organization Science, 11*, 21-34.

- Kim, K. H., & Rasheed, A. A. (2014). Board heterogeneity, corporate diversification and firm performance. *Journal of Management Research, 14*, 121-139.
- Konradt, U., Andreßen, P., & Ellwart, T. (2009). Self-leadership in organizational teams: A multilevel analysis of moderators and mediators. *European Journal of Work and Organizational Psychology, 18*, 322-346.
- Kor, Y. Y. (2006). Direct and interaction effects of top management team and board compositions on R&D investment strategy. *Strategic Management Journal, 27*, 1081-1099.
- Langfred, C. W. (2007). The downside of self-management: A longitudinal study of the effects of conflict on trust, autonomy, and task interdependence in self-managing teams. *Academy of Management Journal, 50*, 885-900.
- LeDoux, J. A., Gorman, C. A., & Woehr, D. J. (2012). The impact of interpersonal perceptions on team processes: A social relations analysis. *Small Group Research, 43*, 356-382.
- Lee, H. U., & Park, J. H. (2006). Top team diversity, internationalization and the mediating effect of international alliances. *British Journal of Management, 17*, 195-213.
- Lee, H. U., & Park, J. H. (2008). The influence of top management team international exposure on international alliance formation. *Journal of Management Studies, 45*, 961-981.
- l'heureux, R. A. (1994). *The Effect of Internationalization on the Relationship between TMT Characteristics and Firm Performance*. Unpublished doctoral dissertation, The Florida State University.
- Li, H., & Li, J. (2009). Top management team conflict and entrepreneurial strategy making in China. *Asia Pacific Journal of Management, 26*, 263-283.
- Lira, E. M., Ripoll, P., Peiró, J. M., & González, P. (2007). The roles of group potency and information and communication technologies in the relationship between task conflict and team effectiveness: A longitudinal study. *Computers in Human Behavior, 23*, 2888-2903.
- Liu, J., Fu, P., & Liu, S. (2009). Conflicts in top management teams and team/firm outcomes: The moderating effects of conflict-handling approaches. *International Journal of Conflict Management, 20*, 228-250.
- Lohrke, F. T., Franklin, G. M., & Kothari, V. B. (2003). Top management team heterogeneity and SME export performance: Investigating the role of environmental uncertainty. *Journal of Small Business Strategy, 14*, 86-102.
- Lovelace, K., Shapiro, D. L., & Weingart, L. R. (2001). Maximizing cross-functional new product teams' innovativeness and constraint adherence: A conflict communications perspective. *Academy of Management Journal, 44*, 779-793.
- Lubatkin, M. H., Simsek, Z., Ling, Y., & Veiga, J. F. (2006). Ambidexterity and performance in small-to medium-sized firms: The pivotal role of top management team behavioral integration. *Journal of Management, 32*, 646-672.
- Lyngsie, J., & Foss, N. J. (2017). The more, the merrier? Women in top management teams and entrepreneurship in established firms. *Strategic Management Journal, 38*, 487-505.
- Mael, F. A., & Alderks, C. E. (1993). Leadership team cohesion and subordinate work unit morale and performance. *Military Psychology, 5*, 141-158.

- Magni, M., Proserpio, L., Hoegl, M., & Provera, B. (2009). The role of team behavioral integration and cohesion in shaping individual improvisation. *Research Policy*, 38, 1044-1053.
- Menguc, B., & Auh, S. (2005). A test of strategic orientation formation versus strategic orientation implementation: The influence of TMT functional diversity and inter-functional coordination. *Journal of Marketing Theory and Practice*, 13, 4-19.
- Menon, A., Bharadwaj, S. G., & Howell, R. (1996). The quality and effectiveness of marketing strategy: Effects of functional and dysfunctional conflict in Intraorganizational relationships. *Journal of the Academy of Marketing Science*, 24, 299-313.
- Michel, J. G., & Hambrick, D. C. (1992). Diversification posture and top management team characteristics. *Academy of Management Journal*, 35, 9-37.
- Minichilli, A., Zattoni, A., & Zona, F. (2009). Making boards effective: An empirical examination of board task performance. *British Journal of Management*, 20, 55-74.
- Mishra (1992). *Organizational Responses to Crisis: The Role of Mutual Trust and Top Management Teams*. Unpublished doctoral dissertation, The University of Michigan.
- Mitchell, R., Nicholas, S., & Boyle, B. (2009). The role of openness to cognitive diversity and group processes in knowledge creation. *Small Group Research*, 40, 535-554.
- Mohammed, S., & Angell, L. C. (2004). Surface and deep level diversity in workgroups: Examining the moderating effects of team orientation and team process on relationship conflict. *Journal of Organizational Behavior*, 25, 1015-1039.
- Mosciski, P. D. (2004). *The Influence of Top Management Team Heterogeneity and Internationalization on Firm Performance*. Unpublished doctoral dissertation, Nova Southeastern University.
- Moye, N. A., & Langfred, C. W. (2004). Information sharing and group conflict: Going beyond decision making to understand the effects of information sharing on group performance. *International Journal of Conflict Management*, 15, 381-410.
- Mwenja, D M. (2006). *Founder Centrality and Top Management Team Social Network Effects on Top Management Behavioral Integration and Firm Performance in Family Business*. Unpublished doctor dissertation. Alliant International University, San Diego.
- Nadolska, A., & Barkema, H. G. (2014). Good learners: How top management teams affect the success and frequency of acquisitions. *Strategic Management Journal*, 35, 1483-1507.
- Nielsen, B. B., & Nielsen, S. (2013). Top management team nationality diversity and firm performance: A multilevel study. *Strategic Management Journal*, 34, 373-382.
- O'bannon, D. P. (1997). *Top Management Team Composition: A Strategic-decision Making Perspective of the Homogeneity-Heterogeneity Paradox*. Unpublished doctoral dissertation, University of Maryland.
- Olson, B. J., Parayitam, S., & Bao, Y. (2007). Strategic decision making: The effects of cognitive diversity, conflict, and trust on decision outcomes. *Journal of Management*, 33, 196-222.
- Olson, B. J., Parayitam, S., & Twigg, N. W. (2006). Mediating role of strategic choice between top management team diversity and firm performance: Upper echelons theory revisited. *Journal of Business and Management*, 12, 111-126.

- Opstrup, N., & Villadsen, A. R. (2015). The right mix? Gender diversity in top management teams and financial performance. *Public Administration Review*, *75*, 291-301.
- Parayitam, S., & Dooley, R. S. (2011). Is too much cognitive conflict in strategic decision-making teams too bad?. *International Journal of Conflict Management*, *22*, 342-357.
- Parola, H. R., Ellis, K. M., & Golden, P. (2015). Performance effects of top management team gender diversity during the merger and acquisition process. *Management Decision*, *53*, 57-74.
- Passos, A. M., & Caetano, A. (2005). Exploring the effects of intragroup conflict and past performance feedback on team effectiveness. *Journal of Managerial Psychology*, *20*, 231-244.
- Paul, R., Drake, J. R., & Liang, H. (2016). Global virtual team performance: The effect of coordination effectiveness, trust, and team cohesion. *IEEE Transactions on Professional Communication*, *59*, 186-202.
- Pearce, R. J. (2000). The general manager's perspective on how factionalism can impact the behaviors and effectiveness of top managers inside a shared management joint venture. *Journal of Management and Governance*, *4*, 189-206.
- Pelled, L. H., Eisenhardt, K. M., & Xin, K. R. (1999). Exploring the black box: An analysis of work group diversity, conflict and performance. *Administrative Science Quarterly*, *44*, 1-28.
- Peterson, R. S., & Behfar, K. J. (2003). The dynamic relationship between performance feedback, trust, and conflict in groups: A longitudinal study. *Organizational Behavior and Human Decision Processes*, *92*, 102-112.
- Peterson, R. S., Smith, D. B., Martorana, P. V., & Owens, P. D. (2003). The impact of chief executive officer personality on top management team dynamics: One mechanism by which leadership affects organizational performance. *Journal of Applied Psychology*, *88*, 795-808.
- Peyrefitte, J. (1996). *Corporate Strategic Reorientation and Adjustment: A Longitudinal Analysis of the Effects of Top Management Teams*. Unpublished doctoral dissertation, Florida Atlantic University.
- Polzer, J. T., Milton, L. P., & Swarm Jr, W. B. (2002). Capitalizing on diversity: Interpersonal congruence in small work groups. *Administrative Science Quarterly*, *47*, 296-324.
- Priesemuth, M., Schminke, M., Ambrose, M. L., & Folger, R. (2014). Abusive supervision climate: A multiple-mediation model of its impact on group outcomes. *Academy of Management Journal*, *57*, 1513-1534.
- Puck, J., & Pregonig, U. (2014). The effect of task conflict and cooperation on performance of teams: Are the results similar for different task types?. *European Management Journal*, *32*, 870-878.
- Quigley, N. R., Tekleab, A. G., & Tesluk, P. E. (2007). Comparing consensus-and aggregation-based methods of measuring team-level variables: The role of relationship conflict and conflict management processes. *Organizational Research Methods*, *10*, 589-608.
- Quintana-García, C., & Benavides-Velasco, C. A. (2016). Gender diversity in top management teams and innovation capabilities: The initial public offerings of biotechnology firms.

- Long Range Planning*, 49, 507-518.
- Quintana-García, C., Benavides-Velasco, C. A., & Guzmán-Parra, V. F. (2016). Science-based firms going public: The role of patent indicators and top management teams. *Industry and Innovation*, 23, 243-259.
- Raver, J. L., & Gelfand, M. J. (2005). Beyond the individual victim: Linking sexual harassment, team processes, and team performance. *Academy of Management Journal*, 48, 387-400.
- Richard, O. C., & Shelor, R. M. (2002). Linking top management team age heterogeneity to firm performance: Juxtaposing two mid-range theories. *International Journal of Human Resource Management*, 13, 958-974.
- Sahaym, A., Cho, S. Y., Kim, S. K., & Mousa, F. T. (2016). Mixed blessings: How top management team heterogeneity and governance structure influence the use of corporate venture capital by post-IPO firms. *Journal of Business Research*, 69, 1208-1218.
- Simons, T. L., & Peterson, R. S. (2000). Task conflict and relationship conflict in top management teams: The pivotal role of intragroup trust. *Journal of Applied Psychology*, 85, 102-111.
- Stoker, J. I., Grutterink, H., & Kolk, N. J. (2012). Do transformational CEOs always make the difference? The role of TMT feedback seeking behavior. *The Leadership Quarterly*, 23, 582-592.
- Stovall, J. F. (2005). *Not-for-profit Top Management Team Dynamics: Understanding the Top Management Team Potency-Performance Relationship*. Unpublished doctoral dissertation, Claremont Graduated University.
- Talaulicar, T., Grundei, J., & Werder, A. V. (2005). Strategic decision making in start-ups: The effect of top management team organization and processes on speed and comprehensiveness. *Journal of Business Venturing*, 20, 519-541.
- Talke, K., Salomo, S., & Rost, K. (2010). How top management team diversity affects innovativeness and performance via the strategic choice to focus on innovation fields. *Research Policy*, 39, 907-918.
- Tanikawa, T., Tanikawa, T., Kim, S., Kim, S., Jung, Y., & Jung, Y. (2017). Top management team diversity and firm performance: Exploring a function of age. *Team Performance Management: An International Journal*, 23, 156-170.
- Tekleab, A. G., Karaca, A., Quigley, N. R., & Tsang, E. W. (2016). Re-examining the functional diversity–performance relationship: The roles of behavioral integration, team cohesion, and team learning. *Journal of Business Research*, 69, 3500-3507.
- Tekleab, A. G., Quigley, N. R., & Tesluk, P. E. (2009). A longitudinal study of team conflict, conflict management, cohesion, and team effectiveness. *Group & Organization Management*, 34, 170-205.
- Tran, H. Q. (2013). *Top Management Team Behavioral Integration, Organizational Ambidexterity, and Small Firms' Performance: The Moderating Effect of Entrepreneurial Orientation*. Unpublished doctoral dissertation, University of Texas-Pan American.
- Van Der Vegt, G. S., & Bunderson, J. S. (2005). Learning and performance in multidisciplinary teams: The importance of collective team identification. *Academy of Management Journal*, 48, 532-547.

- Von Buch, S. D. (2006). *The Relationship of Family Influence, Top Management Teams Behavioral Integration, and Firm Performance in German Family*. Unpublished doctoral dissertation, Alliant International University.
- Wan, G. (2015). *Two Essays on Top Management Team Demographic Composition and Organizational Outcomes*. Unpublished doctoral dissertation, The Hong Kong University of Science and Technology.
- Wang, Z., He, Q., & Zhou, P. (2016). *Top Management Team Heterogeneity Influence on Technological Innovation – The Empirical Analysis on the IT Enterprises from Six*. Paper presented at the Wuhan international conference on e-business – knowledge management and business intelligence.
- Weisz (2004). *The Theoretical and Empirical Assessment of the Social Capital of Nascent Entrepreneurial Teams*. Unpublished doctoral dissertation, Purdue University.
- West □. G. P. (1995). *Strategic Renewal through Knowledge Creation: The Impact of Top Management Team Time Orientations and Communications*. Unpublished doctoral dissertation, University of Colorado
- West, M. A., & Anderson, N. R. (1996). Innovation in top management teams. *Journal of Applied Psychology, 81*, 680-693.
- Wiersema, M. F., & Bird, A. (1993). Organizational demography in Japanese firms: Group heterogeneity, individual dissimilarity, and top management team turnover. *Academy of Management Journal, 36*, 996-1025.
- Wiersema, M. F., & Bantel, K. A. (1993). Top management team turnover as an adaptation mechanism: The role of the environment. *Strategic Management Journal, 14*, 485-504.
- Yap, C. M., Chai, K. H., & Lemaire, P. (2005). An empirical study on functional diversity and innovation in SMEs. *Creativity and Innovation Management, 14*, 176-190.
- Yeh, Y. J., & Chou, H. W. (2005). Team composition and learning behaviors in cross-functional teams. *Social Behavior and Personality: An International Journal, 33*, 391-402.
- Yoon, W., Kim, S. J., & Song, J. (2016). Top management team characteristics and organizational creativity. *Review of Managerial Science, 10*, 757-779.
- Yuan, X. N., Guo, Z., & Fang, E. (2014). An examination of how and when the top management team matters for firm innovativeness: The effects of TMT functional backgrounds. *Innovation, 16*, 323-342.
- Zhang, X. A., Li, N., Ullrich, J., & van Dick, R. (2015). Getting everyone on board: The effect of differentiated transformational leadership by CEOs on top management team effectiveness and leader-rated firm performance. *Journal of Management, 41*, 1898-1933.
- Zimmerman, M. A. (2008). The influence of top management team heterogeneity on the capital raised through an initial public offering. *Entrepreneurship Theory and Practice, 32*, 391-414.
- Zona, F., & Zattoni, A. (2007). Beyond the black box of demography: Board processes and task effectiveness within Italian firms. *Corporate Governance: An International Review, 15*, 852-864.

**Appendix C**

List of meta-analyses used for the meta-analytic structural equation modeling analysis (N=3)

De Wit, F. R., Greer, L. L., & Jehn, K. A. (2012). The paradox of intragroup conflict: A meta-analysis. *Journal of Applied Psychology, 97*, 360-390.

Mesmer-Magnus, J. R., & DeChurch, L. A. (2009). Information sharing and team performance: A meta-analysis. *Journal of Applied Psychology, 94*, 535-546.

O'Neill, T. A., Allen, N. J., & Hastings, S. E. (2013). Examining the “pros” and “cons” of team conflict: A team-level meta-analysis of task, relationship, and process conflict. *Human Performance, 26*, 236-260.
